# Supplementary material for: Perfluorosulfonic acid polymer based eATRP for ultrasensitive detection of CYFRA21-1 DNA
Source: Royal Society of Chemistry journal article supplement (doi:10.1039/d0ay00328j), 2020-01-01
Supplement: d0ay00328j1.pdf [file d0ay00328j1.pdf]

## Supporting Information

### Perfluorosulfonic acid polymer based eATRP for ultrasensitive detection of CYFRA21-1 DNA

Kai Hu<sup>a</sup>, Jiamin Cheng<sup>a</sup>, Jing Li<sup>a</sup>, Shan Ye<sup>a</sup>, Huaixia Yang<sup>a,\*</sup>, Yanju Liu<sup>a,\*</sup>,

Jinming Kong<sup>b,\*</sup>

<sup>a</sup> Henan University of Chinese Medicine, Zhengzhou 450046, P. R. China

<sup>b</sup> School of Environmental and Biological Engineering, Nanjing University of Science and Technology, Nanjing 210094, P. R. China

\* Corresponding authors.

Huaixia Yang (E-mail: yhx998@hactcm.edu.cn)

Yanju Liu (E-mail: liuyanju886@hactcm.edu.cn)

Jinming Kong (E-mail: j.kong@njust.edu.cn)

#### Table of contents:

- (1) AFM images of the electrode before the eATRP and after the eATRP
- (2) Optimization of the  $E_{app}$
- (3) Optimization of initiator reaction time and eATRP time

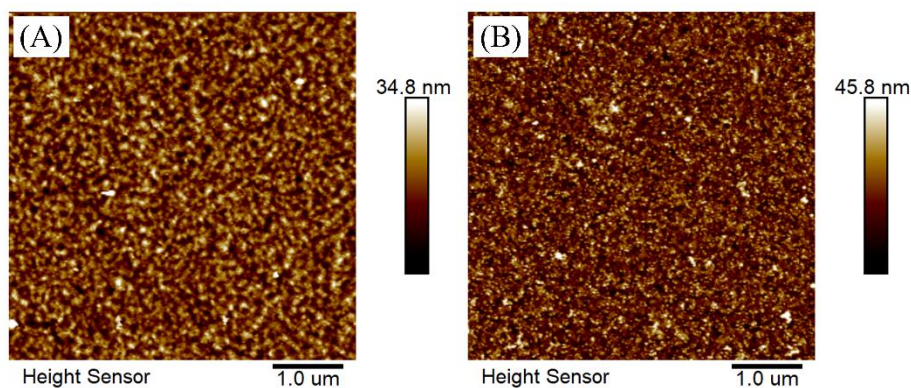

**Fig. S1:** AFM images of PNA/MCH/DNA/Zr<sup>4+</sup>/Nafion-modified electrode (A), the PNA/MCH/DNA/Zr<sup>4+</sup>/Nafion/FMMA-modified electrode after 40 min eATRP reaction (B). The

scale bars showing surface roughness are placed on the side of the images.

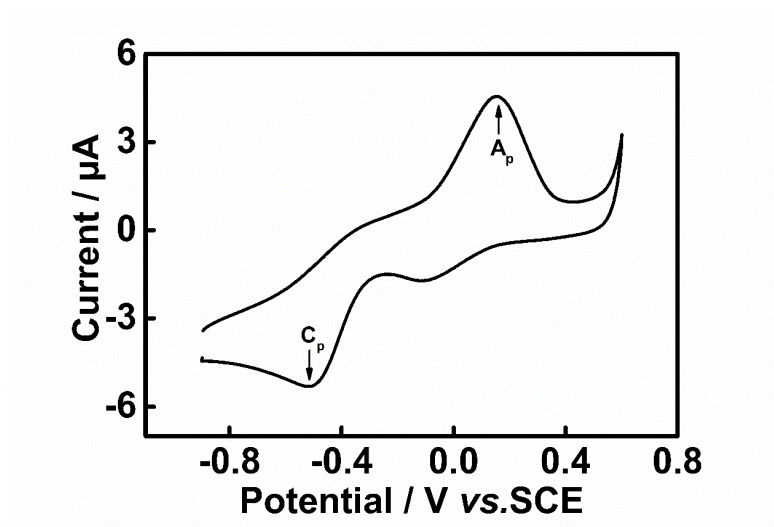

**Fig. S2:** The cyclic voltammogram of the PNA/MCH/DNA/Zr<sup>4+</sup>/Nafion-modified electrode in the FMMA-free eATRP cocktail.

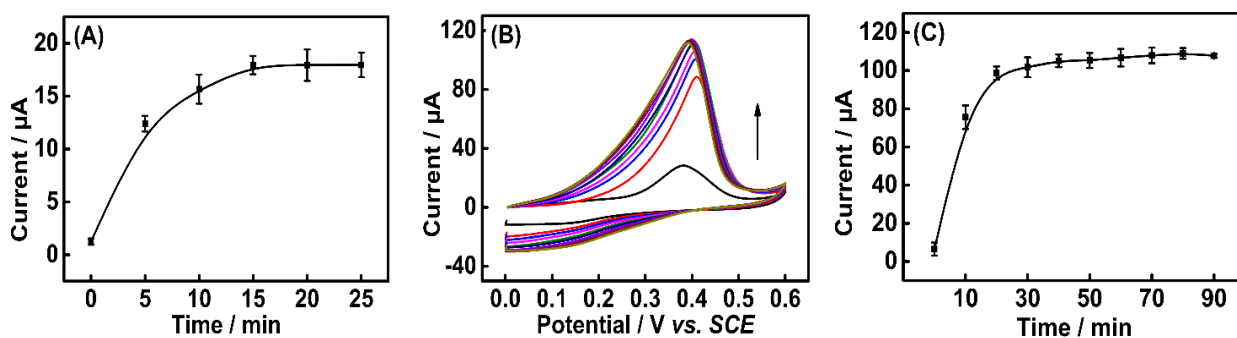

**Fig. S3:** (A) The plots of peak current versus initiator reaction time. (B) The cyclic voltammogram of PNA/MCH/DNA/Zr<sup>4+</sup>/Nafion/FMMA-modified electrode in the eATRP cocktail for the monitoring of the aggregation of ferrocenylmethyl methacrylate on the electrode surface. CV was applied every ten minutes at scan rate of 1000 mV s<sup>-1</sup>. (C) The plots of peak current versus eATRP time.
